# Supplementary material for: In Vitro Analysis of Human Cartilage Infiltrated by Hydrogels and Hydrogel-Encapsulated Chondrocytes
Source: MDPI journal article supplement (doi:10.3390/bioengineering10070767), 2023-06-26
Supplement: s1 [file s1]

# In vitro Analysis of Human Cartilage Infiltrated by Hydrogels and Hydrogel-Encapsulated Chondrocytes

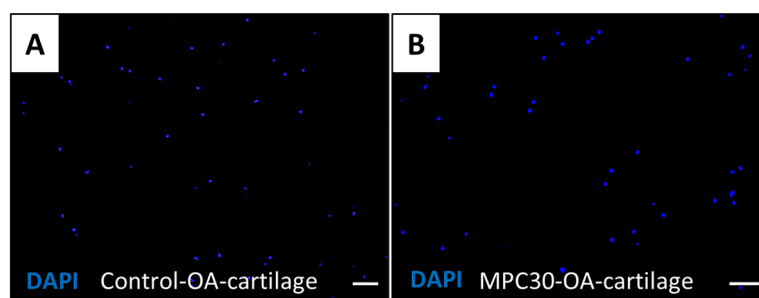

**Figure S1.** Fluorescence based staining of human articular cartilage sections. No red background staining was observed in human OA-cartilage sections (A) without both MTR and MPC30-hydrogel and (B) exemplary with MPC30-hydrogel but without MTR; n = 6. Magnification 4×. Scale bar 50  $\mu$ m.

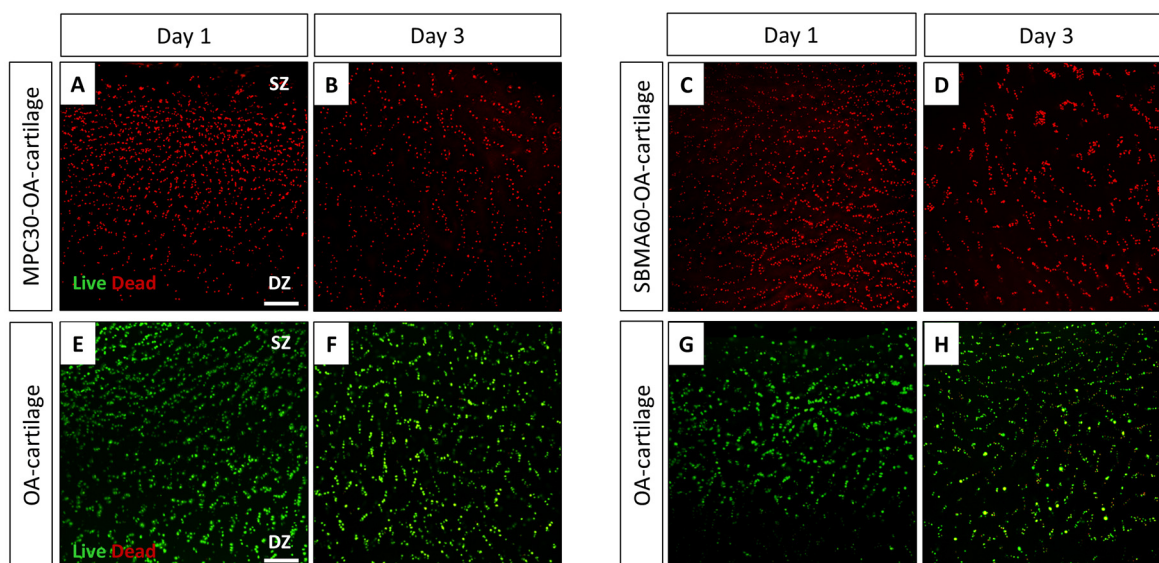

**Figure S2.** LIVE/DEAD® Viability/Cytotoxicity assay of human OA-cartilage explants. Living cells of cross-sectional slices of human OA-cartilage tissue are stained with Ca-AM (green) and dead cells are stained with EthD-1 (red). (A,B) Hydrogels containing isolated chondrocytes from OA-cartilage explants which were infiltrated with MPC30-monomer solutions for 24h and subsequently polymerized, showed mostly dead cells after one and three days in culture. (C,D) OA-cartilage explants which were infiltrated with SBMA60-monomer solutions for 24h and subsequently polymerized show mostly dead chondrocytes after one and three days in culture. (E–H) Chondrocytes of OA-cartilage without hydrogels consisted mostly of living cells after one and three days in culture. Human OA-cartilage is classified in SZ (superficial zone) and DZ (deep zone). n = 5; magnification 10×. Scale bar 200  $\mu$ m.

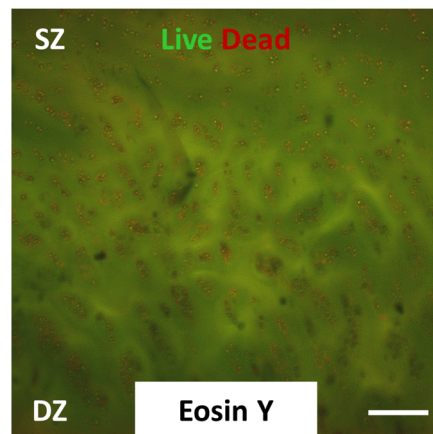

**Figure S3.** LIVE/DEAD® Viability/Cytotoxicity assay of unpolymerized Eosin Y within human OA-cartilage explants. Due to the autofluorescence of inactivated Eosin Y, living and dead cells cannot be identified. Human OA-cartilage is classified in SZ (superficial zone) and DZ (deep zone).  $n = 3$ ; magnification 10 $\times$ . Scale bar 200  $\mu\text{m}$ .

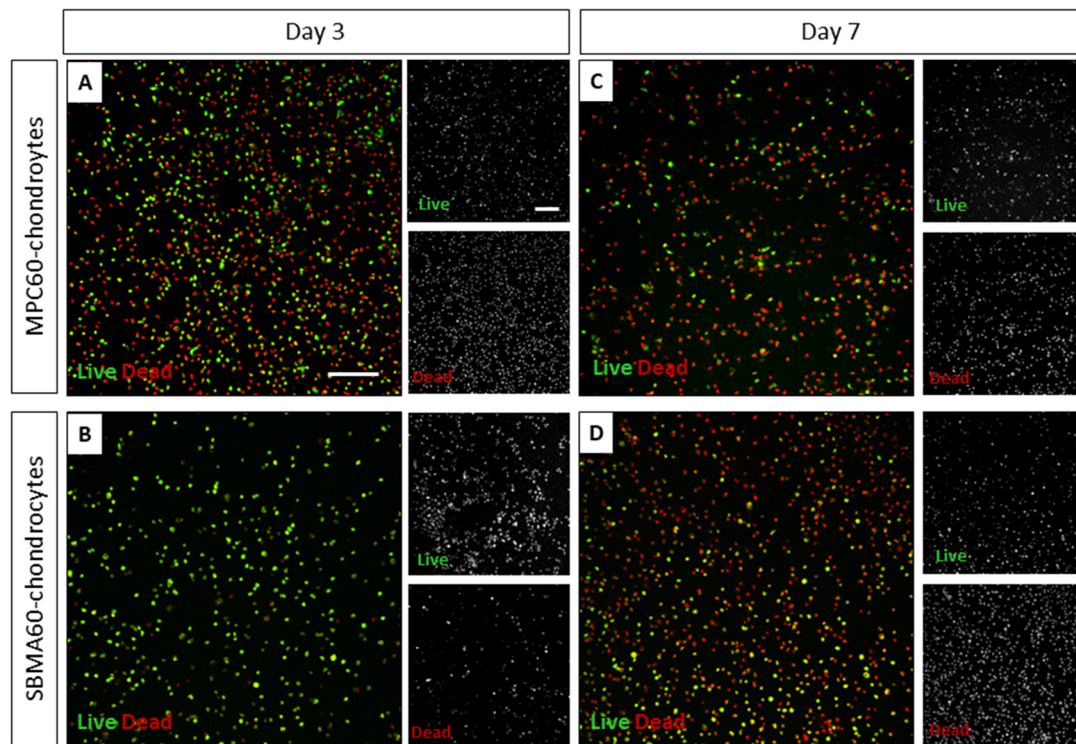

**Figure S4.** LIVE/DEAD® Viability/Cytotoxicity assay of isolated encapsulated OA-chondrocytes into hydrogels. Living chondrocytes are stained with Ca-AM (green) and dead cells are stained with EthD-1 (red). (A,C) MPC60-hydrogel contained scattered living but mostly dead cells after three and seven days in culture. (B,D) SBMA60-hydrogels showed also living and dead cells after three and seven days in culture. Insets on the right side show EthD-1 (live) and Ca-AM (dead) individually. Human OA-cartilage is classified in SZ (superficial zone) and DZ (deep zone).  $n = 5$ ; magnification 10 $\times$ . Scale bar 200  $\mu\text{m}$ .

**Table S1.** Listing of used OA-patient samples including sex, age, and associated experiment.

| OA-patient | sex    | age | experiment                           |
|------------|--------|-----|--------------------------------------|
| 1          | mal    | 58  | FTIR_MPC60 (3.1)                     |
| 2          | male   | 71  | FTIR_MPC60 (3.1)                     |
| 3          | male   | 74  | FTIR_MPC60 (3.1)                     |
| 4          | female | 79  | FTIR_MPC60 (3.1)                     |
| 5          | male   | 78  | FTIR_MPC60 (3.1)                     |
| 6          | male   | 50  | FTIR_MPC60 (3.1)                     |
| 7          | female | 79  | FTIR_MPC30 (3.1)                     |
| 8          | male   | 50  | FTIR_MPC30 (3.1)                     |
| 9          | male   | 74  | FTIR_MPC30 (3.1)                     |
| 10         | male   | 78  | FTIR_MPC30 (3.1)                     |
| 11         | male   | 71  | FTIR_MPC30 (3.1)                     |
| 12         | female | 73  | FTIR_MPC30 (3.1)                     |
| 13         | male   | 71  | FTIR_SBMA60 (3.1)                    |
| 14         | female | 82  | FTIR_SBMA60 (3.1)                    |
| 15         | male   | 73  | FTIR_SBMA60 (3.1)                    |
| 16         | male   | 73  | FTIR_SBMA60 (3.1)                    |
| 17         | male   | 78  | FTIR_SBMA60 (3.1)                    |
| 18         | male   | 74  | FTIR_SBMA60 (3.1)                    |
| 19         | male   | 62  | SEM_MPC60 (3.1)                      |
| 20         | male   | 58  | SEM_MPC60 (3.1)                      |
| 21         | female | 82  | SEM_MPC60 (3.1)                      |
| 22         | female | 73  | SEM_MPC60 (3.1)                      |
| 23         | female | 67  | SEM_MPC60 (3.1)                      |
| 24         | female | 78  | SEM_MPC60 (3.1)                      |
| 25         | male   | 40  | Fluorescence microscopy_MPC60 (3.1)  |
| 26         | male   | 62  | Fluorescence microscopy_MPC60 (3.1)  |
| 27         | female | 63  | Fluorescence microscopy_MPC60 (3.1)  |
| 28         | male   | 58  | Fluorescence microscopy_MPC60 (3.1)  |
| 29         | female | 62  | Fluorescence microscopy_MPC60 (3.1)  |
| 30         | female | 88  | Fluorescence microscopy_MPC60 (3.1)  |
| 31         | male   | 80  | Fluorescence microscopy_MPC30 (3.1)  |
| 32         | male   | 84  | Fluorescence microscopy_MPC30 (3.1)  |
| 33         | female | 88  | Fluorescence microscopy_MPC30 (3.1)  |
| 34         | male   | 50  | Fluorescence microscopy_MPC30 (3.1)  |
| 35         | male   | 78  | Fluorescence microscopy_MPC30 (3.1)  |
| 36         | female | 79  | Fluorescence microscopy_MPC30 (3.1)  |
| 37         | female | 56  | Fluorescence microscopy_SBMA60 (3.1) |
| 38         | female | 62  | Fluorescence microscopy_SBMA60 (3.1) |
| 39         | male   | 50  | Fluorescence microscopy_SBMA60 (3.1) |
| 40         | male   | 78  | Fluorescence microscopy_SBMA60 (3.1) |
| 41         | female | 79  | Fluorescence microscopy_SBMA60 (3.1) |
| 42         | Female | 62  | Fluorescence microscopy_SBMA60 (3.1) |

---

|    |        |    |                                             |
|----|--------|----|---------------------------------------------|
| 43 | male   | 78 | OA-cartilage_CLSM_livedead+CTB_MPC60 (3.2)  |
| 44 | female | 71 | OA-cartilage_CLSM_livedead+CTB_MPC60 (3.2)  |
| 45 | male   | 82 | OA-cartilage_CLSM_livedead+CTB_MPC60 (3.2)  |
| 46 | female | 68 | OA-cartilage_CLSM_livedead+CTB_MPC60 (3.2)  |
| 47 | female | 68 | OA-cartilage_CLSM_livedead+CTB_MPC60 (3.2)  |
| 48 | male   | 79 | OA-cartilage_CLSM_livedead+CTB_MPC30 (3.2)  |
| 49 | female | 74 | OA-cartilage_CLSM_livedead+CTB_MPC30 (3.2)  |
| 50 | male   | 65 | OA-cartilage_CLSM_livedead+CTB_MPC30 (3.2)  |
| 51 | male   | 55 | OA-cartilage_CLSM_livedead+CTB_MPC30 (3.2)  |
| 52 | male   | 61 | OA-cartilage_CLSM_livedead+CTB_MPC30 (3.2)  |
| 53 | female | 74 | OA-cartilage_CLSM_livedead+CTB_SBMA60 (3.2) |
| 54 | female | 71 | OA-cartilage_CLSM_livedead+CTB_SBMA60 (3.2) |
| 55 | female | 70 | OA-cartilage_CLSM_livedead+CTB_SBMA60 (3.2) |
| 56 | male   | 74 | OA-cartilage_CLSM_livedead+CTB_SBMA60 (3.2) |
| 57 | male   | 75 | OA-cartilage_CLSM_livedead+CTB_SBMA60 (3.2) |
| 58 | female | 49 | Chondrocytes_CLSM_livedead+CTB_MPC60 (3.2)  |
| 59 | female | 47 | Chondrocytes_CLSM_livedead+CTB_MPC60 (3.2)  |
| 60 | female | 52 | Chondrocytes_CLSM_livedead+CTB_MPC60 (3.2)  |
| 61 | male   | 52 | Chondrocytes_CLSM_livedead+CTB_MPC60 (3.2)  |
| 62 | male   | 58 | Chondrocytes_CLSM_livedead+CTB_MPC60 (3.2)  |
| 63 | female | 49 | Chondrocytes_CLSM_livedead+CTB_SBMA60 (3.2) |
| 64 | male   | 52 | Chondrocytes_CLSM_livedead+CTB_SBMA60 (3.2) |
| 65 | female | 83 | Chondrocytes_CLSM_livedead+CTB_SBMA60 (3.2) |
| 66 | female | 85 | Chondrocytes_CLSM_livedead+CTB_SBMA60 (3.2) |
| 67 | female | 73 | Chondrocytes_CLSM_livedead+CTB_SBMA60 (3.2) |
| 68 | female | 81 | Component analyses CLSM_livedead (3.3)      |
| 69 | male   | 70 | Component analyses CLSM_livedead (3.3)      |
| 70 | male   | 55 | Component analyses CLSM_livedead (3.3)      |
| 71 | female | 72 | time analyses CLSM_livedead (3.3)           |
| 72 | female | 71 | time analyses CLSM_livedead (3.3)           |
| 73 | male   | 73 | time analyses CLSM_livedead (3.3)           |

---
